# Supplementary material for: Screening potential dye sensitizers for water splitting photocatalysts using a genetic algorithm
Source: Royal Society of Chemistry journal article supplement (doi:10.1039/d4cp01487a), 2024-01-01
Supplement: d4cp01487a1.pdf [file d4cp01487a1.pdf]

# Supporting Information

## Screening potential dye sensitizers for water splitting photocatalysts using a Genetic Algorithm

Tao Liu<sup>\*a</sup>, Linjiang Chen<sup>\*b</sup>, Xiaoyan Wang<sup>a</sup>, and Andrew I. Cooper<sup>\*a</sup>

*<sup>a</sup>Department of Chemistry and Materials Innovation Factory, Leverhulme Research Centre for Functional Materials Design, University of Liverpool, 51 Oxford Street, Liverpool, L7 3NY, UK.*

Email: T. Liu                      [tao.liu@liverpool.ac.uk](mailto:tao.liu@liverpool.ac.uk)  
Email: A.I. Cooper                [aicooper@liverpool.ac.uk](mailto:aicooper@liverpool.ac.uk)

*<sup>b</sup>School of Chemistry and School of Computer Science, University of Birmingham, Birmingham, B15 2TT UK*

Email: L. Chen                      [l.j.chen@bham.ac.uk](mailto:l.j.chen@bham.ac.uk)

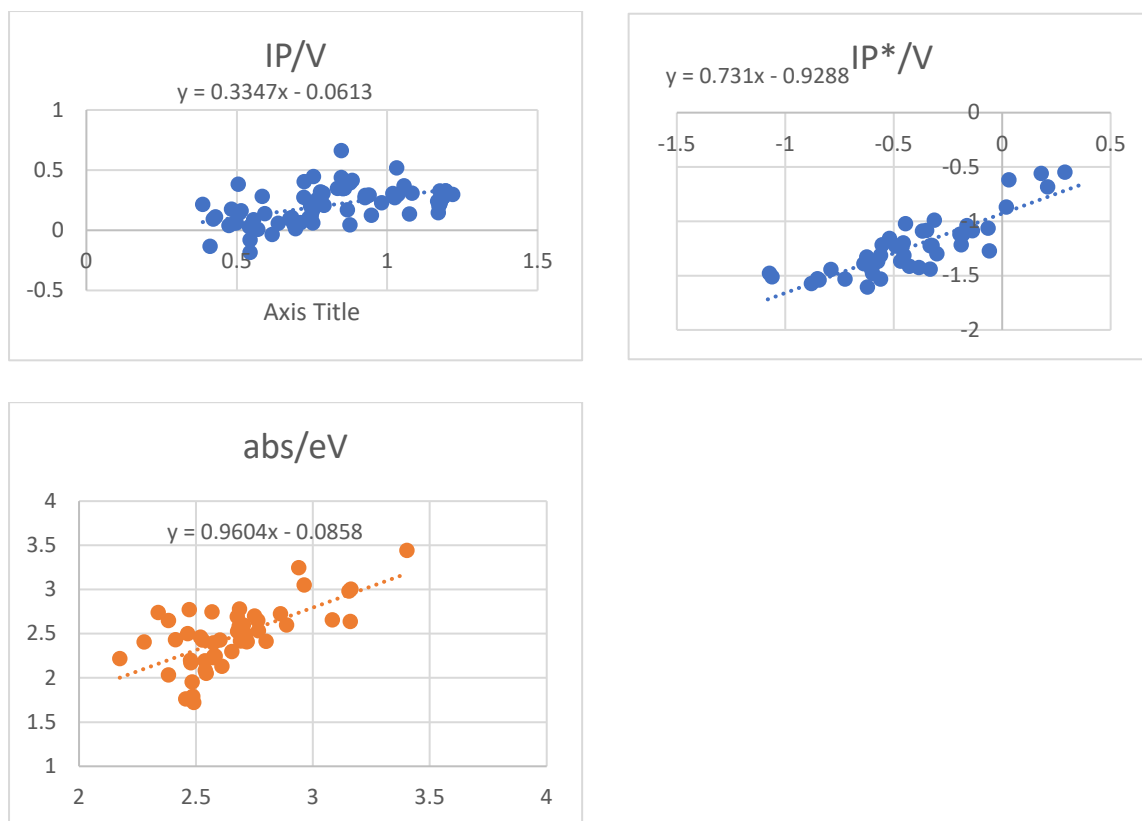

**Figure S1.** Calibration of IP, IP\*, and absorption of GNF-xTB (x axis) on TD-DFT (y axis) level.

### **Binding energy**

The binding energy quantifies the interaction strength between the dye and FS-COF; a more negative value indicates a stronger interaction. To assess this, we conducted binding energy calculations employing a semiempirical free energy force field, which has been implemented in AutoDock4.<sup>1,2</sup> This calculation involves the evaluation of energies for both the bound and unbound states, and also incorporates a new charge-based desolvation method utilizing a standard set of atom types and charges.<sup>3</sup> Through calibration with over 100 complexes of known structures and binding energies, the standard error was found to be less than 3 kcal/mol. The model used for this binding energy calculation consists of eight layers of FS-COF forming a single channel as the receptor, with a dye molecule serving as the ligand.

$$E_{\text{binding}} = E_{\text{dye\_COF}} - E_{\text{COF}} - E_{\text{dye}}$$

- 1G. M. Morris, D. S. Goodsell, R. S. Halliday, R. Huey, W. E. Hart, R. K. Belew and A. J. Olson, Automated docking using a Lamarckian genetic algorithm and an empirical binding free energy function, *Journal of Computational Chemistry*, 1998, **19**, 1639–1662.
- 2G. M. Morris, R. Huey, W. Lindstrom, M. F. Sanner, R. K. Belew, D. S. Goodsell and A. J. Olson, AutoDock4 and AutoDockTools4: Automated docking with selective receptor flexibility, *J Comput Chem*, 2009, **30**, 2785–2791.
- 3R. Huey, G. M. Morris, A. J. Olson and D. S. Goodsell, A semiempirical free energy force field with charge-based desolvation, *Journal of Computational Chemistry*, 2007, **28**, 1145–1152.

|            |            |            |            |
|------------|------------|------------|------------|
| 0204180301 | 0204180305 | 0401231507 | 0404180301 |
|            |            |            |            |
| 0404180305 | 0415091507 | 0501101507 | 0502180312 |
|            |            |            |            |
| 0504061507 | 0504091507 | 0505130307 | 0515011401 |
|            |            |            |            |
| 0515031507 | 0515061507 | 0515091507 | 1101091507 |
|            |            |            |            |
| 1103150705 | 1115061507 | 1602101507 | 1605130307 |
|            |            |            |            |
| 1611091507 | 1614091507 | 1615021507 | 1615091507 |
|            |            |            |            |

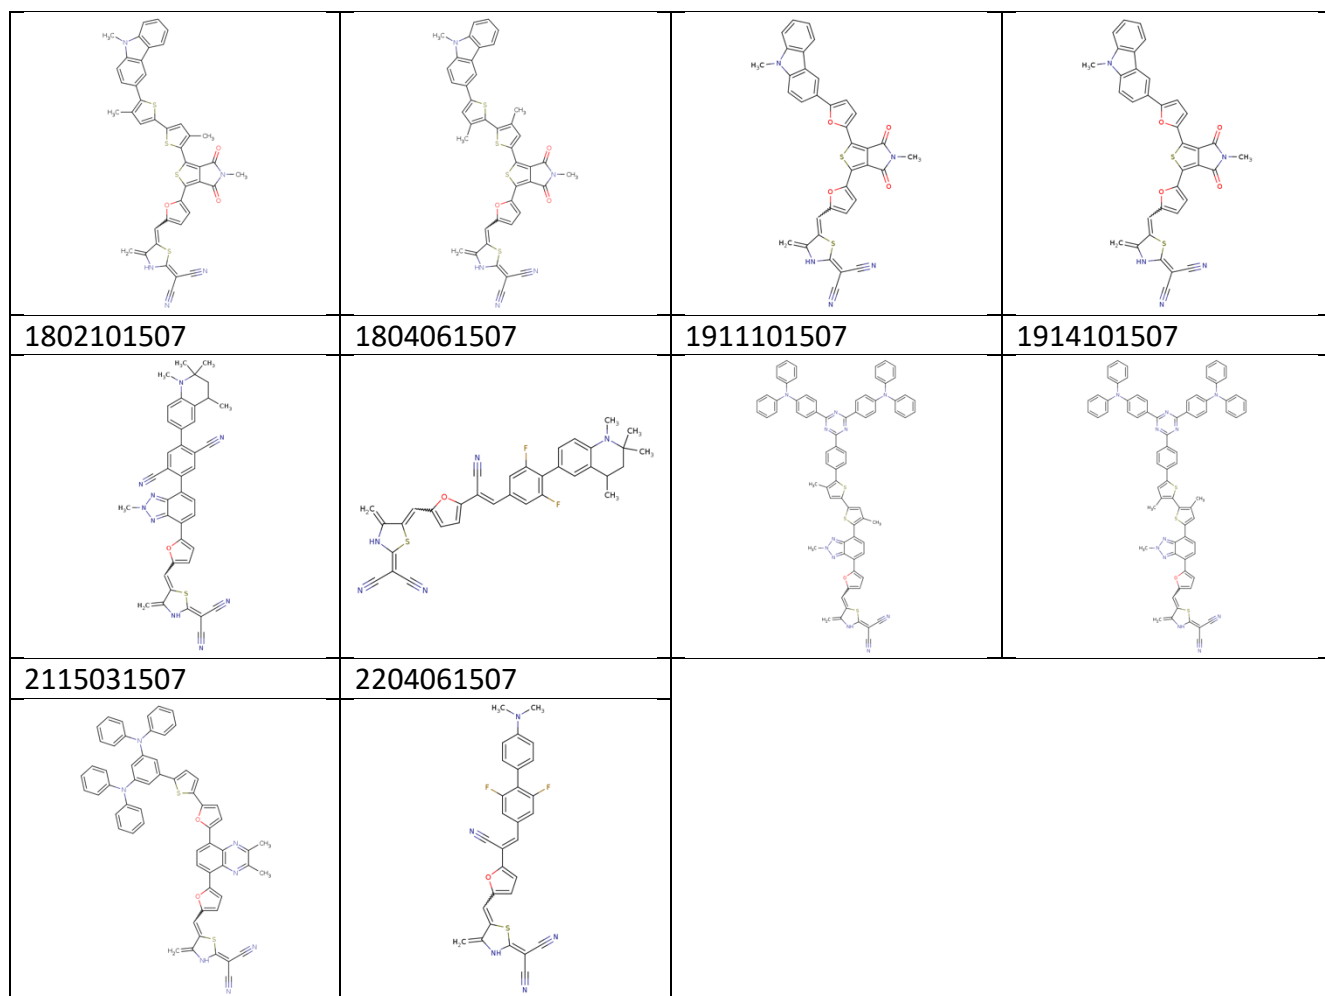

**Figure S2.** Structures of 30 optimized sensitizers screened by setting absorption and/or binding energy as fitness functions in GA.

**Table S1.** IP, IP\*, E<sub>b</sub>, E<sub>abs</sub>, S<sub>r</sub>, DM, E<sub>c</sub> of optimized dyes.

| name       | ID | E <sub>b</sub> | E <sub>abs</sub> | IP*    | IP    | S <sub>r</sub> | DM     | E <sub>c</sub> |
|------------|----|----------------|------------------|--------|-------|----------------|--------|----------------|
| WS5F. Ref. | 0  | -0.93          | 499              | -1.421 | 0.308 | 0.756          | 41.307 | 3.746          |
| 1115061507 | 1  | -2.05          | 531              | -1.469 | 0.252 | 0.800          | 27.397 | 3.632          |
| 1911101507 | 2  | -2.43          | 495              | -1.433 | 0.327 | 0.822          | 12.908 | 3.413          |
| 0515011401 | 3  | -2.13          | 463              | -1.486 | 0.309 | 0.811          | 19.154 | 3.210          |
| 1914101507 | 4  | -1.94          | 504              | -1.426 | 0.275 | 0.825          | 12.836 | 3.329          |
| 1611091507 | 5  | -10.02         | 501              | -1.429 | 0.374 | 0.810          | 39.684 | 3.310          |
| 0515091507 | 6  | -9.04          | 497              | -1.417 | 0.380 | 0.811          | 15.950 | 3.581          |
| 1101091507 | 7  | -4.03          | 496              | -1.448 | 0.319 | 0.806          | 43.326 | 3.329          |
| 1615091507 | 8  | -7.58          | 495              | -1.408 | 0.417 | 0.800          | 31.577 | 3.472          |
| 1804061507 | 9  | -4.99          | 481              | -1.473 | 0.290 | 0.799          | 38.434 | 3.585          |
| 2204061507 | 10 | -3.9           | 476              | -1.413 | 0.414 | 0.810          | 32.778 | 3.716          |
| 0505130307 | 11 | -3.85          | 465              | -1.570 | 0.337 | 0.773          | 4.609  | 4.177          |
| 0504091507 | 12 | -4.25          | 464              | -1.514 | 0.523 | 0.812          | 44.644 | 3.771          |
| 1802101507 | 13 | -4.55          | 457              | -1.579 | 0.366 | 0.815          | 21.376 | 3.835          |
| 0501101507 | 14 | -4.85          | 500              | -1.520 | 0.272 | 0.822          | 10.728 | 3.393          |
| 0515031507 | 15 | -5.36          | 493              | -1.510 | 0.278 | 0.815          | 7.857  | 3.363          |
| 1605130307 | 16 | -8.17          | 530              | -1.411 | 0.316 | 0.787          | 27.502 | 3.724          |
| 0415091507 | 17 | -6.36          | 508              | -1.417 | 0.328 | 0.808          | 12.649 | 3.439          |
| 1614091507 | 18 | -10.65         | 503              | -1.426 | 0.284 | 0.806          | 43.876 | 3.311          |
| 1615021507 | 19 | -8.33          | 475              | -1.543 | 0.299 | 0.805          | 34.494 | 3.717          |
| 2115031507 | 20 | -0.74          | 506              | -1.463 | 0.306 | 0.812          | 9.441  | 3.252          |
| 0401231507 | 21 | -5             | 522              | -1.557 | 0.349 | 0.841          | 14.558 | 3.661          |
| 0404180305 | 22 | -6.34          | 501              | -1.480 | 0.431 | 0.848          | 21.428 | 4.455          |
| 0204180305 | 23 | -5.8           | 501              | -1.508 | 0.271 | 0.851          | 60.754 | 4.410          |
| 0204180301 | 24 | -3.8           | 499              | -1.503 | 0.273 | 0.853          | 58.991 | 4.411          |
| 0404180301 | 25 | -5.67          | 500              | -1.486 | 0.431 | 0.850          | 24.115 | 4.346          |
| 0515061507 | 26 | -9.36          | 529              | -1.378 | 0.327 | 0.815          | 8.444  | 3.640          |
| 0504061507 | 27 | -6.34          | 472              | -1.382 | 0.517 | 0.817          | 10.784 | 4.032          |
| 1103150705 | 28 | -2.3           | 518              | -1.371 | 0.349 | 0.763          | 9.386  | 3.745          |
| 1602101507 | 29 | -8.16          | 452              | -1.380 | 0.657 | 0.817          | 8.561  | 3.769          |
| 0505090701 | 30 | -3.93          | 479              | -1.576 | 0.434 | 0.776          | 7.335  | 3.556          |
| 1105130307 | 31 | -0.71          | 477              | -1.620 | 0.247 | 0.771          | 8.689  | 3.958          |
| 0500141507 | 32 | -5.18          | 443              | -1.575 | 0.468 | 0.794          | 37.842 | 4.007          |
| 0502221505 | 33 | -5.16          | 417              | -1.580 | 0.522 | 0.772          | 5.386  | 3.571          |
| 1602221505 | 34 | -5.52          | 415              | -1.624 | 0.521 | 0.772          | 13.489 | 3.636          |
| 1605101505 | 35 | -5.17          | 415              | -1.774 | 0.425 | 0.812          | 21.431 | 3.945          |
| 1602231505 | 36 | -7.09          | 408              | -1.611 | 0.610 | 0.861          | 4.213  | 4.213          |
| 0002221505 | 37 | -2.84          | 422              | -1.660 | 0.385 | 0.756          | 3.378  | 3.378          |
| 0402221505 | 38 | -4.95          | 420              | -1.633 | 0.457 | 0.768          | 6.388  | 3.457          |
| 0102230405 | 39 | -4.67          | 410              | -1.671 | 0.395 | 0.663          | 27.677 | 3.871          |

|            |    |       |     |        |       |       |        |       |
|------------|----|-------|-----|--------|-------|-------|--------|-------|
| 0202231507 | 40 | -5.77 | 429 | -1.782 | 0.350 | 0.838 | 24.178 | 3.717 |
| 1802230509 | 41 | -4.02 | 426 | -1.769 | 0.378 | 0.664 | 32.226 | 4.309 |
| 0505230509 | 42 | -5.78 | 426 | -1.677 | 0.444 | 0.666 | 18.948 | 4.327 |
| 0402230509 | 43 | -5.49 | 425 | -1.733 | 0.470 | 0.666 | 14.854 | 4.263 |
| 0504070309 | 44 | -5.75 | 414 | -2.140 | 0.511 | 0.764 | 22.338 | 3.750 |
| 0504231505 | 45 | -6.75 | 404 | -1.707 | 0.513 | 0.865 | 6.975  | 4.317 |
